# Supplementary material for: Significant Surface Spin Effects and Exchange Bias in Iron Oxide-Based Hollow Magnetic Nanoparticles
Source: MDPI journal article supplement (doi:10.3390/nano12030456), 2022-01-28
Supplement: s1 [file s1]

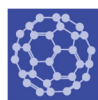

# Significant Surface Spin Effects and Exchange Bias in Iron Oxide-Based Hollow Magnetic Nanoparticles

Pelayo García Acevedo <sup>1,\*</sup>, Manuel A. González Gómez <sup>1</sup>, Ángela Arnosa Prieto <sup>1</sup>, Jose S. Garitaonandia <sup>2</sup>, Yolanda Piñeiro <sup>1</sup> and José Rivas <sup>1,\*</sup>

<sup>1</sup> NANOMAG Laboratory, Applied Physics Department, iMATUS Materials Institute, Universidade de Santiago de Compostela, 15782 Santiago de Compostela, Spain; manuelantonio.gonzalez@usc.es (M.A.G.G.); angela.arnosa@usc.es (Á.A.P.); y.pineiro.redondo@usc.es (Y.P.)

<sup>2</sup> Faculty of Science and Technology, University of the Basque Country (UPV/EHU), 48940 Leioa, Spain; js.garitaonandia@ehu.eus

\* Correspondence: pelayo.garcia.acevedo@usc.es (P.G.A.); jose.rivas@usc.es (J.R.); Tel.: +34-881813097 (P.G.A.); +34-881813062 (J.R.)

## 1. Spin-Glass-like Behaviour

The magnetic dynamics for core/void/shell (C/V/S) MNPs and hollow MNPs were studied using real  $\chi'(T)$  and imaginary  $\chi''(T)$  components of the AC susceptibility. Figures S1 shows the temperature dependence of the real part  $\chi'(T)$  (figure S1.a for C/V/S MNPs and Figure S1.b for hollow MNPs) and the imaginary part  $\chi''(T)$  (Inset in figure S1.a for C/V/S MNPs and inset in figure S1.b for hollow MNPs) of the ac susceptibility at different frequencies (10, 200, 500 and 1000 Hz). These curves show a maximum for both  $\chi'(T)$  and  $\chi''(T)$  components, defined as  $T'_{\max}$  and  $T''_{\max}$ . For  $\chi'(T)$  component, a shift to higher temperatures when the frequency  $\omega$  increases is observed, while the value of  $\chi'$  decreases. It is typical in disordered systems such as spin glasses [1]. However,  $\chi'(T)$  is frequency independent at  $T > T'_{\max}$ , indicating a superparamagnetic behaviour for both MNPs. For  $\chi''(T)$  component, a shift to higher temperatures is also observed, but the value of  $\chi''$  increases. The blocking temperature,  $T_B$ , is obtained as the temperature where the maximum happens in the  $\chi'(T)$  curve. The  $T_B$  values obtained are 111.61 K ( $\omega = 10$  Hz), 118.72 K ( $\omega = 200$  Hz), 119.61 K ( $\omega = 500$  Hz) and 120.50 K ( $\omega = 1000$  Hz) for C/V/S MNPs and 100.00 K ( $\omega = 10$  Hz), 108.88 K ( $\omega = 200$  Hz), 109.77 K ( $\omega = 500$  Hz) and 111.55 K ( $\omega = 1000$  Hz) for hollow MNPs.

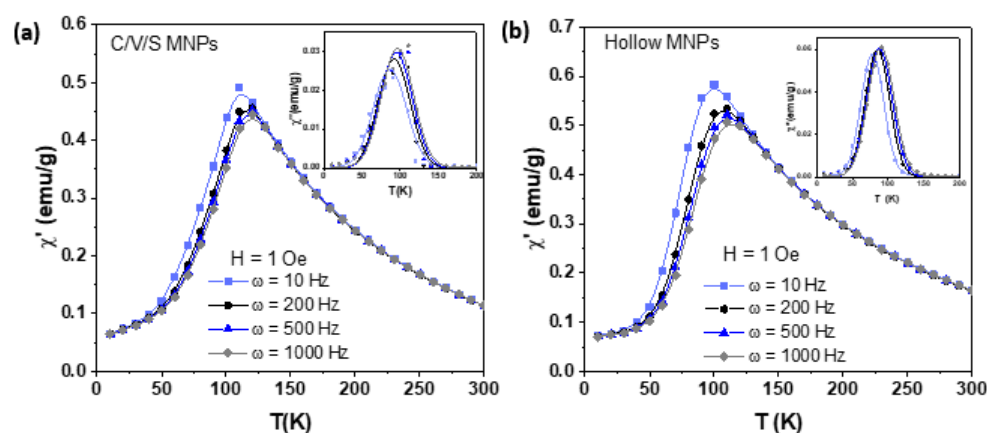

**Figure S1.** Temperature dependence of the real component  $\chi'(T)$  of (a) C/V/S MNPs and (b) hollow MNPs at 1 Oe. Insets show the imaginary component  $\chi''(T)$  of the magnetic susceptibility of C/V/S MNPs and hollow MNPs.

From AC measurements the spin-glass-like behavior of MNPs was obtained using the  $\phi$  parameter from the relation [1]:

$$\Phi = \frac{\Delta T'_{\max}}{T'_{\max} \cdot \Delta \log(\omega)} \quad (\text{S1})$$

Where  $\Delta T'_{\max}$  is the difference between the maximum values of  $T'_{\max}$  in an interval  $\Delta \log(\omega)$ . Depending on the values obtained from  $\Phi$ , it is possible to differentiate whether the MNPs behave as a spin-glass-like system (if  $\Phi < 0.06$ ) [2]. In our case, values of  $\Phi = 0.04$  were obtained for C/V/S MNPs and  $\Phi = 0.05$  for hollow MNPs, suggesting a spin-glass-like surface behavior in both MNPs.

## 2. Hysteresis Loops under FC Conditions of Solid and Hollow Fe<sub>3</sub>O<sub>4</sub> MNPs

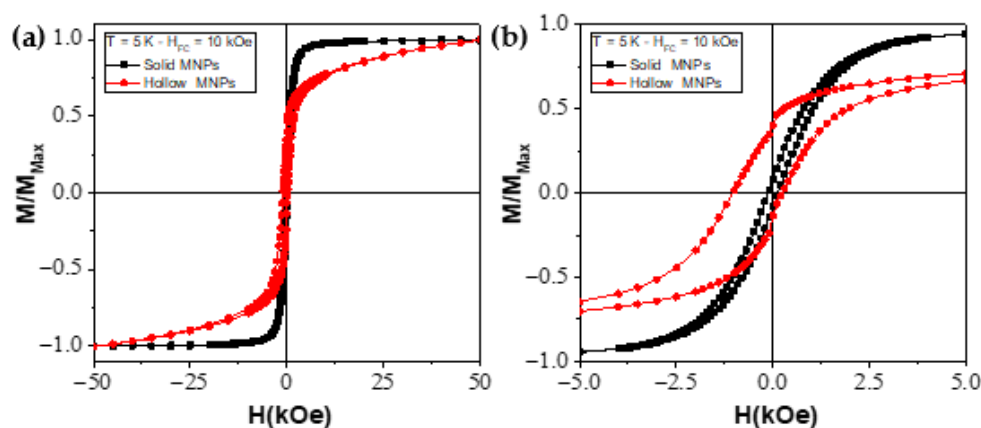

**Figure S2.** Hysteresis loops of solid iron oxide based MNPs (black points) and hollow iron oxide based MNPs (red points) at 5 K and with  $H_{\text{FC}} = 10$  kOe in the range of (a)  $-50$  and  $50$  kOe. For clarity the range between  $-5$  and  $5$  kOe is shown in (b).

## References

1. Masunaga, S.H.; Jardim, R.F.; Fichtner, P.F.P.; Rivas, J. Role of dipolar interactions in a system of Ni nanoparticles studied by magnetic susceptibility measurements. *Phys. Rev. B* **2009**, *80*, 184428, <https://doi.org/10.1103/physrevb.80.184428>.
2. Nemati, Z.; Khurshid, H.; Alonso, J.; Phan, M.H.; Mukherjee, P.; Srikanth, H. From core/shell to hollow Fe/ $\gamma$ -Fe<sub>2</sub>O<sub>3</sub> nanoparticles: evolution of the magnetic behavior. *Nanotechnology* **2015**, *26*, 405705, <https://doi.org/10.1088/0957-4484/26/40/405705>.
